# Supplementary material
Source: publisher site journal article supplement (https://www.dovepress.com/article/267123)
Supplement: Supplementary file 1 [file get_supplementary_file.php]

## Supplementary data

**To the paper:** “Asymptomatic hyperuricemia associates with cardiometabolic risk indicators in overweight/obese but not in lean adolescents”

K. Šebeková<sup>1</sup>, R. Gurecká<sup>1,2</sup>, and Ľ. Podracká<sup>3,4</sup>

<sup>1</sup>Institute of Molecular BioMedicine, Faculty of Medicine, Comenius University, Bratislava, Slovakia;

<sup>2</sup>Institute of Medical Physics, Biophysics, Informatics and Telemedicine, Faculty of Medicine,

Comenius University, Bratislava, Slovakia; <sup>3</sup>Department of Pediatrics of Faculty of Medicine,

Comenius University, Bratislava, Slovakia; <sup>4</sup>The National Institute of Children’s Health, Bratislava,

Slovakia

**Supplementary Table S1: Cohort characteristics, between-sex comparison**

|                                                       | <b>All</b>        | <b>Males</b>      | <b>Females</b>    | <b>P</b> |
|-------------------------------------------------------|-------------------|-------------------|-------------------|----------|
| N                                                     | 2 424             | 1 165             | 1 259             |          |
| Age, years                                            | 17.4±1.0          | 17.3±1.0          | 17.4±1.0          | 0.084    |
| Uric acid, μmol/L                                     | 304±74            | 354±60            | 258±51            | <0.001   |
| SBP, mm Hg                                            | 115±13            | 122±12            | 107±9             | <0.001   |
| DBP, mm Hg                                            | 71±8              | 73±8              | 70±7              | <0.001   |
| Height, cm                                            | 172.1±9.3         | 179.0±6.8         | 165.7±6.2         | <0.001   |
| Weight, kg                                            | 66.8±13.9         | 73.9±13.8         | 60.2±10.3         | <0.001   |
| Waist, cm                                             | 75.3±9.2          | 79.3±9.0          | 71.6±7.8          | <0.001   |
| Body mass index, kg/m <sup>2</sup>                    | 22.4±3.7          | 23.0±3.8          | 21.9±3.4          | <0.001   |
| Waist/height                                          | 0.44±0.05         | 0.44±0.05         | 0.43±0.05         | <0.001   |
| Glycemia, mmol/L                                      | 4.8±0.4           | 4.9±0.4           | 4.7±0.4           | <0.001   |
| Insulinemia, μIU/mL                                   | 9.7 (5.9, 15.9)   | 9.5 (5.7, 16.0)   | 9.9 (6.2, 15.8)   | 0.048    |
| HOMA-IR                                               | 2.06 (1.22, 3.49) | 2.08 (1.20, 3.62) | 2.05 (1.25, 3.37) | 0.530    |
| Cholesterol, mmol/L                                   | 4.03±0.76         | 3.81±0.70         | 4.24±0.75         | <0.001   |
| HDL-C, mmol/L                                         | 1.38±0.30         | 1.24±0.22         | 1.51±0.30         | <0.001   |
| LDL-C, mmol/L                                         | 2.25±0.60         | 2.17±0.59         | 2.32±0.60         | <0.001   |
| Triacylglycerols, mmol/L                              | 0.80 (0.53, 1.21) | 0.79 (0.51, 1.22) | 0.81 (0.54, 1.21) | 0.209    |
| Atherogenic index                                     | -0.23±0.22        | -0.19±0.23        | -0.26±0.20        | <0.001   |
| eGFR, mL/s/1.73m <sup>2</sup>                         | 1.78±0.23         | 1.73±0.22         | 1.83±0.23         | <0.001   |
| CRP, mg/L                                             | 0.5 (0.1, 1.6)    | 0.4 (0.1, 1.5)    | 0.5 (0.1, 1.8)    | 0.004    |
| Leukocytes, 10 <sup>9</sup> /L                        | 6.6±1.6           | 6.3±1.4           | 6.9±1.8           | <0.001   |
| Cont. CM score                                        | 2.82±0.91         | 2.86±0.96         | 2.78±0.86         | 0.020    |
| Cont. CM score without waist/height                   | 1.94±0.86         | 1.98±0.91         | 1.92±0.82         | 0.064    |
| <b>Prevalence</b>                                     |                   |                   |                   |          |
| Elevated:                                             |                   |                   |                   |          |
| - SBP, n (%)                                          | 314 (13.0)        | 295 (25.3)        | 19 (1.5)          | <0.001   |
| - DBP, n (%)                                          | 129 (5.3)         | 77 (6.6)          | 52 (4.1)          | 0.008    |
| - BP, n (%)                                           | 372 (15.3)        | 312 (26.8)        | 60 (4.8)          | <0.001   |
| - waist/height, n (%)                                 | 269 (11.1)        | 149 (12.7)        | 120 (9.5)         | 0.012    |
| - Glycemia, n (%)                                     | 100 (4.1)         | 76 (6.5)          | 24 (1.9)          | <0.001   |
| - insulinemia, n (%)                                  | 167 (6.9)         | 93 (8.0)          | 74 (5.9)          | 0.045    |
| - TAG, n (%)                                          | 120 (4.9)         | 62 (5.3)          | 58 (4.6)          | 0.454    |
| - AIP, n (%)                                          | 144 (5.9)         | 100 (8.6)         | 44 (3.5)          | <0.001   |
| - uric acid, n (%)                                    | 224 (9.2)         | 156 (13.2)        | 68 (5.4)          | <0.001   |
| - CRP, n (%)                                          | 212 (8.7)         | 82 (7.0)          | 130 (10.3)        | 0.005    |
| Low HDL-C, n (%)                                      | 463 (19.1)        | 169 (14.5)        | 294 (23.4)        | <0.001   |
| General overweight/obesity, n (%)                     | 532 (21.9)        | 310 (26.6)        | 222 (17.6)        | <0.001   |
| Central obesity and general overweight/obesity, n (%) | 234 (9.7)         | 140 (12.0)        | 96 (7.6)          | <0.001   |
| Metabolic syndrome, n (%)                             | 60 (2.5)          | 45 (3.8)          | 15 (1.2)          | <0.001   |

HOMA-IR – homeostasis model assessment for insulin resistance, HDL-C – high density lipoprotein cholesterol, LDL-C – low density lipoprotein cholesterol, CRP – C-reactive protein, Cont. CM – continuous cardiometabolic score. Data are presented as mean±SD (normally distributed data, geometric mean (-1SD, +1SD) of back-transformed log data (data not fitting to normal distribution were logarithmically transformed prior analysis), or as counts (percentage). Continuous variables were compared using a two-sided Student's test, two-sided Fisher's exact test was used to compare categorical variables. Significant p (< 0.05) is highlighted in bold.

**Supplementary Figure S1: Classification tree: lean females**

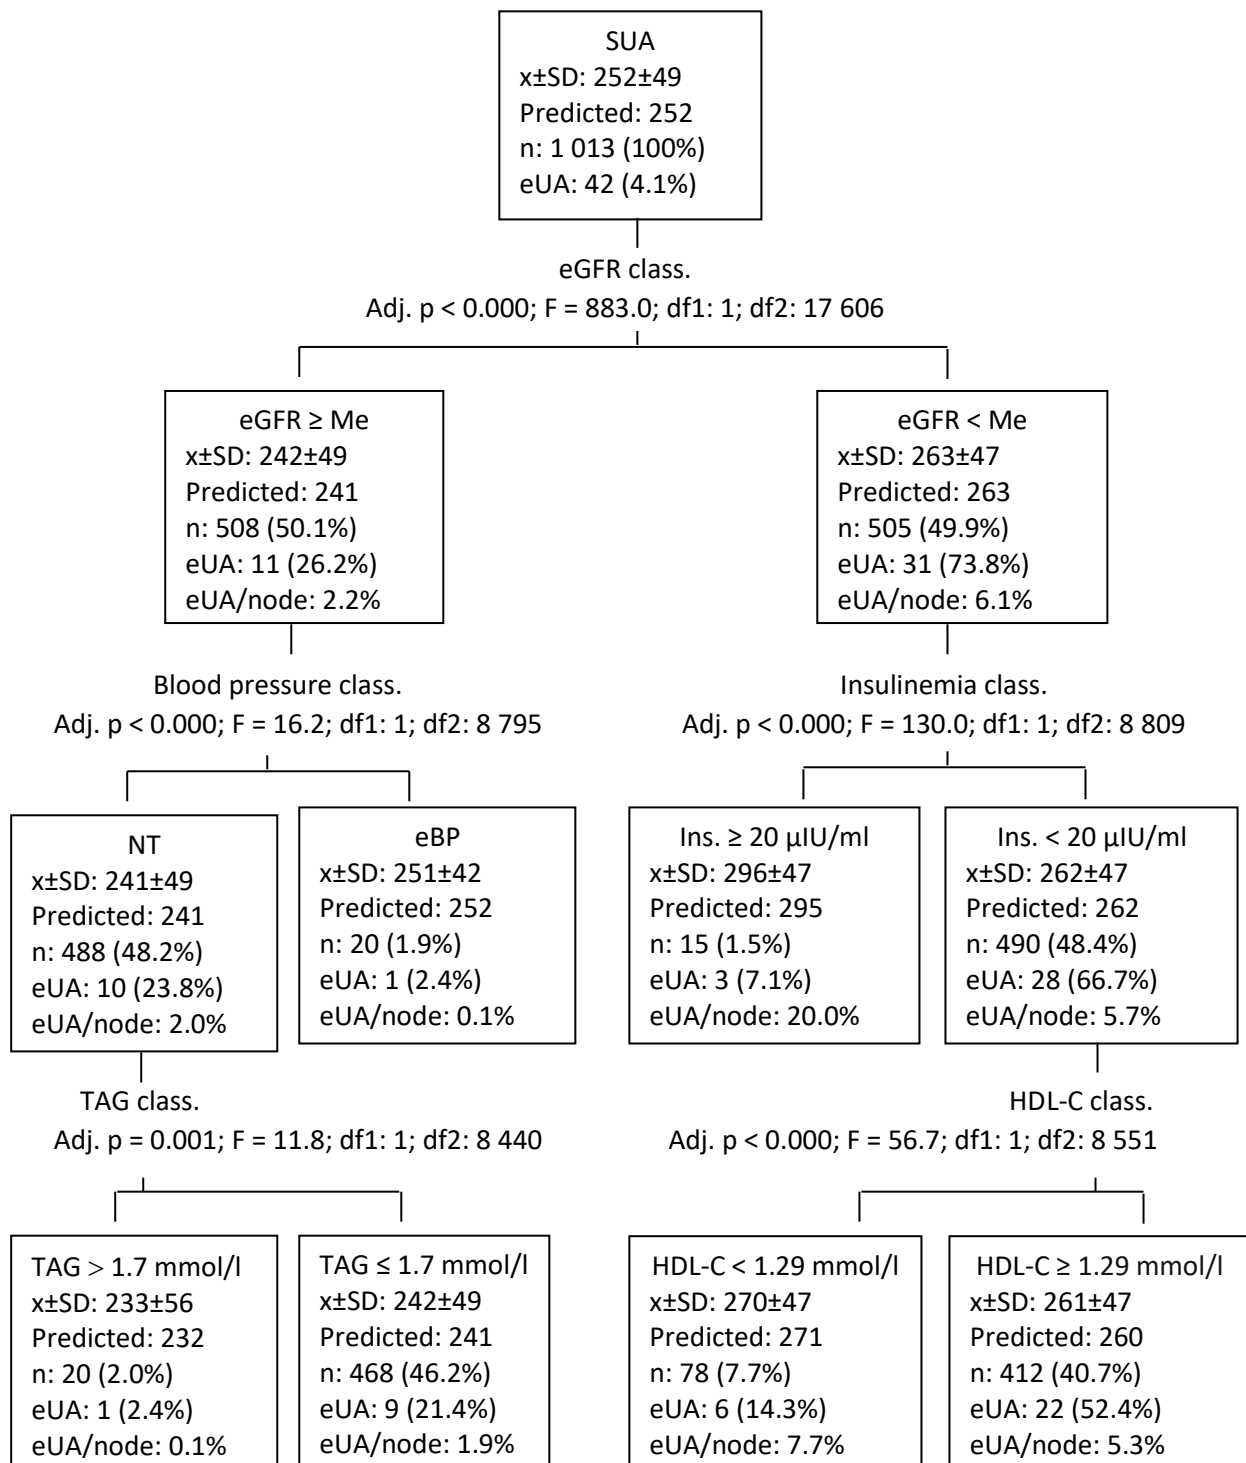

SUA: serum uric acid concentration; x±SD: mean SUA ± standard deviation in node; n: number of subjects in node (percentage of all subjects); predicted: SUA concentration predicted by the model; eUA: number of subjects with elevated SUA, e.g. ≥ 340 µmol/l (percentage of all subjects with eUA); eUA/node: prevalence of subjects with SUA in a particular node; eGFR: estimated glomerular filtration rate; Me: median = 1.81 mL/s/1.73m<sup>2</sup>; class.: classification; Adj.: adjusted; Me: median; NT: normotension (systolic BP < 130 mmHg and diastolic BP < 85 mmHg); eBP: elevated BP (systolic BP ≥ 130 mmHg and/or diastolic BP ≥ 85 mmHg); Ins: fasting plasma insulin; TAG: triacylglycerols; HDL-C: high-density lipoprotein cholesterol

**Supplementary Figure S2: Decision tree: lean males**

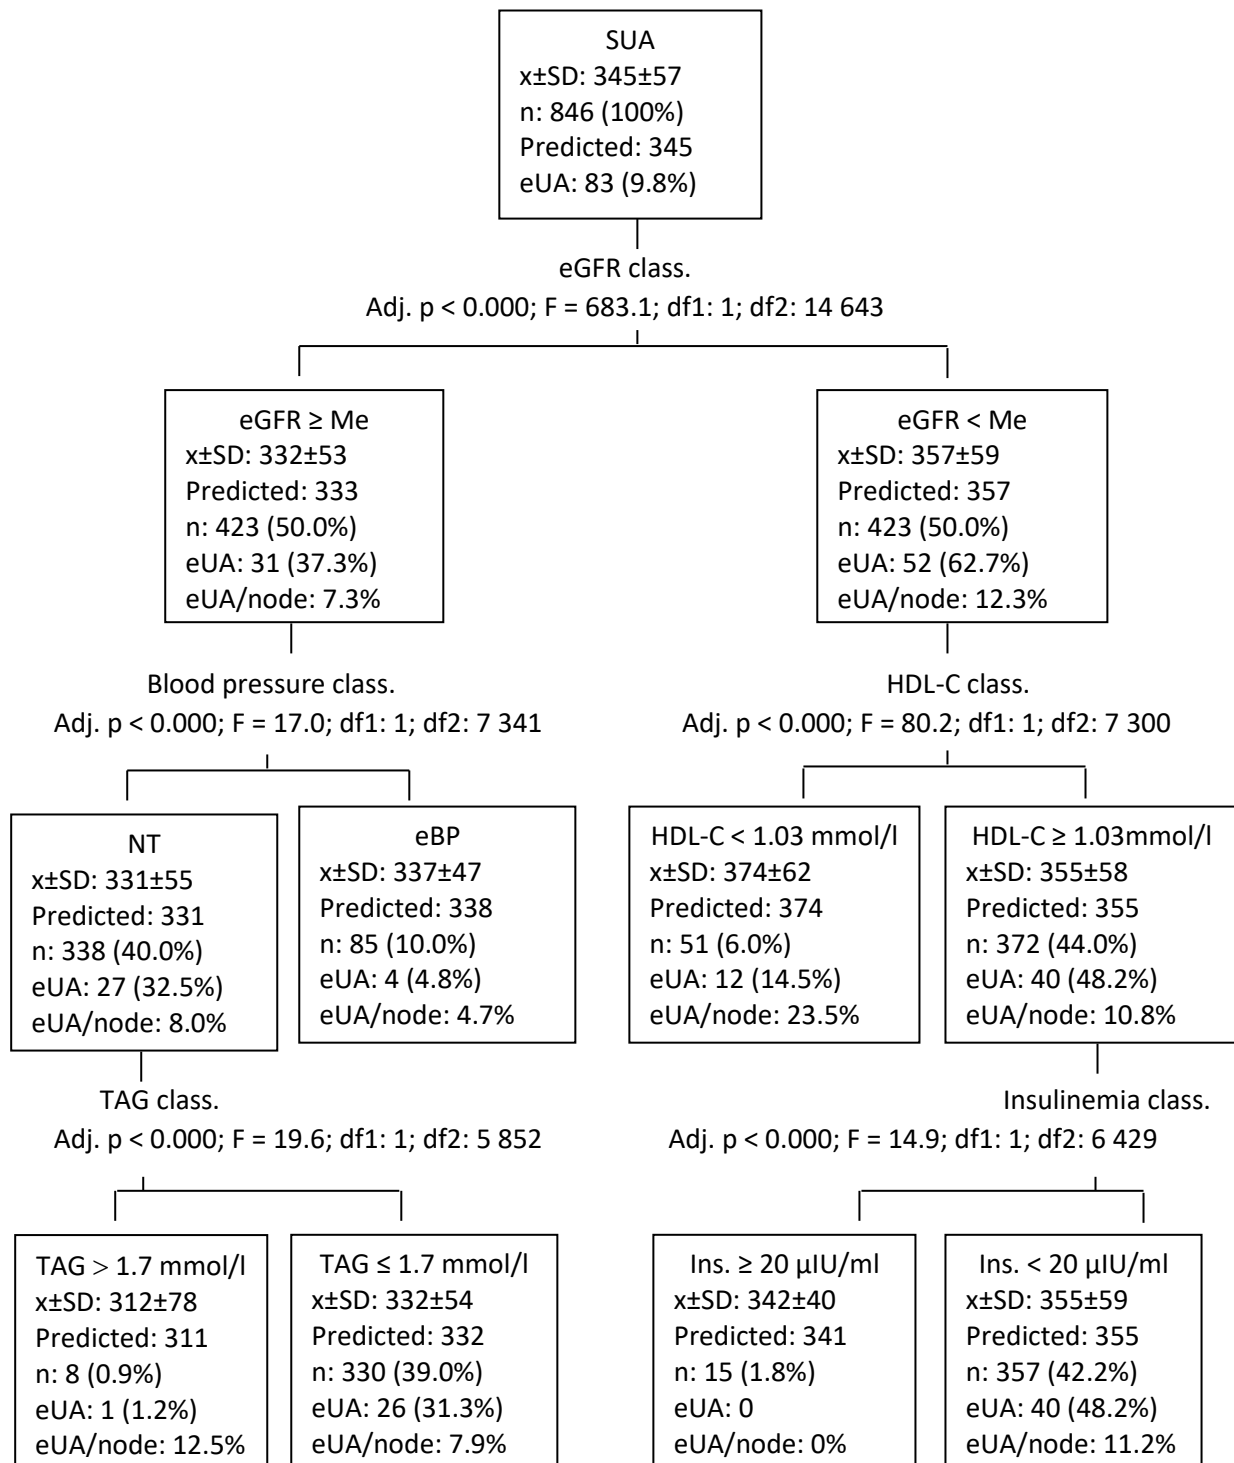

SUA: serum uric acid concentration; x±SD: mean SUA ± standard deviation in node; n: number of subjects in node (percentage of all subjects); predicted: SUA concentration predicted by the model; eUA: number of subjects with elevated SUA, e.g. ≥ 420 µmol/l (percentage of all subjects with eUA); eUA/node: prevalence of subjects with SUA in a particular node; eGFR: estimated glomerular filtration rate; Me: median = 1.71 mL/s/1.73m<sup>2</sup>; class.: classification; Adj.: adjusted; Me: median; NT: normotension (systolic BP < 130 mmHg and diastolic BP < 85 mmHg); eBP: elevated blood pressure (systolic BP ≥ 130 mmHg and/or diastolic BP ≥ 85 mmHg); HDL-C: high-density lipoprotein cholesterol; Ins.: fasting plasma insulin; TAG: triacylglycerols

**Supplementary Figure S3: Decision tree: overweight/obese females**

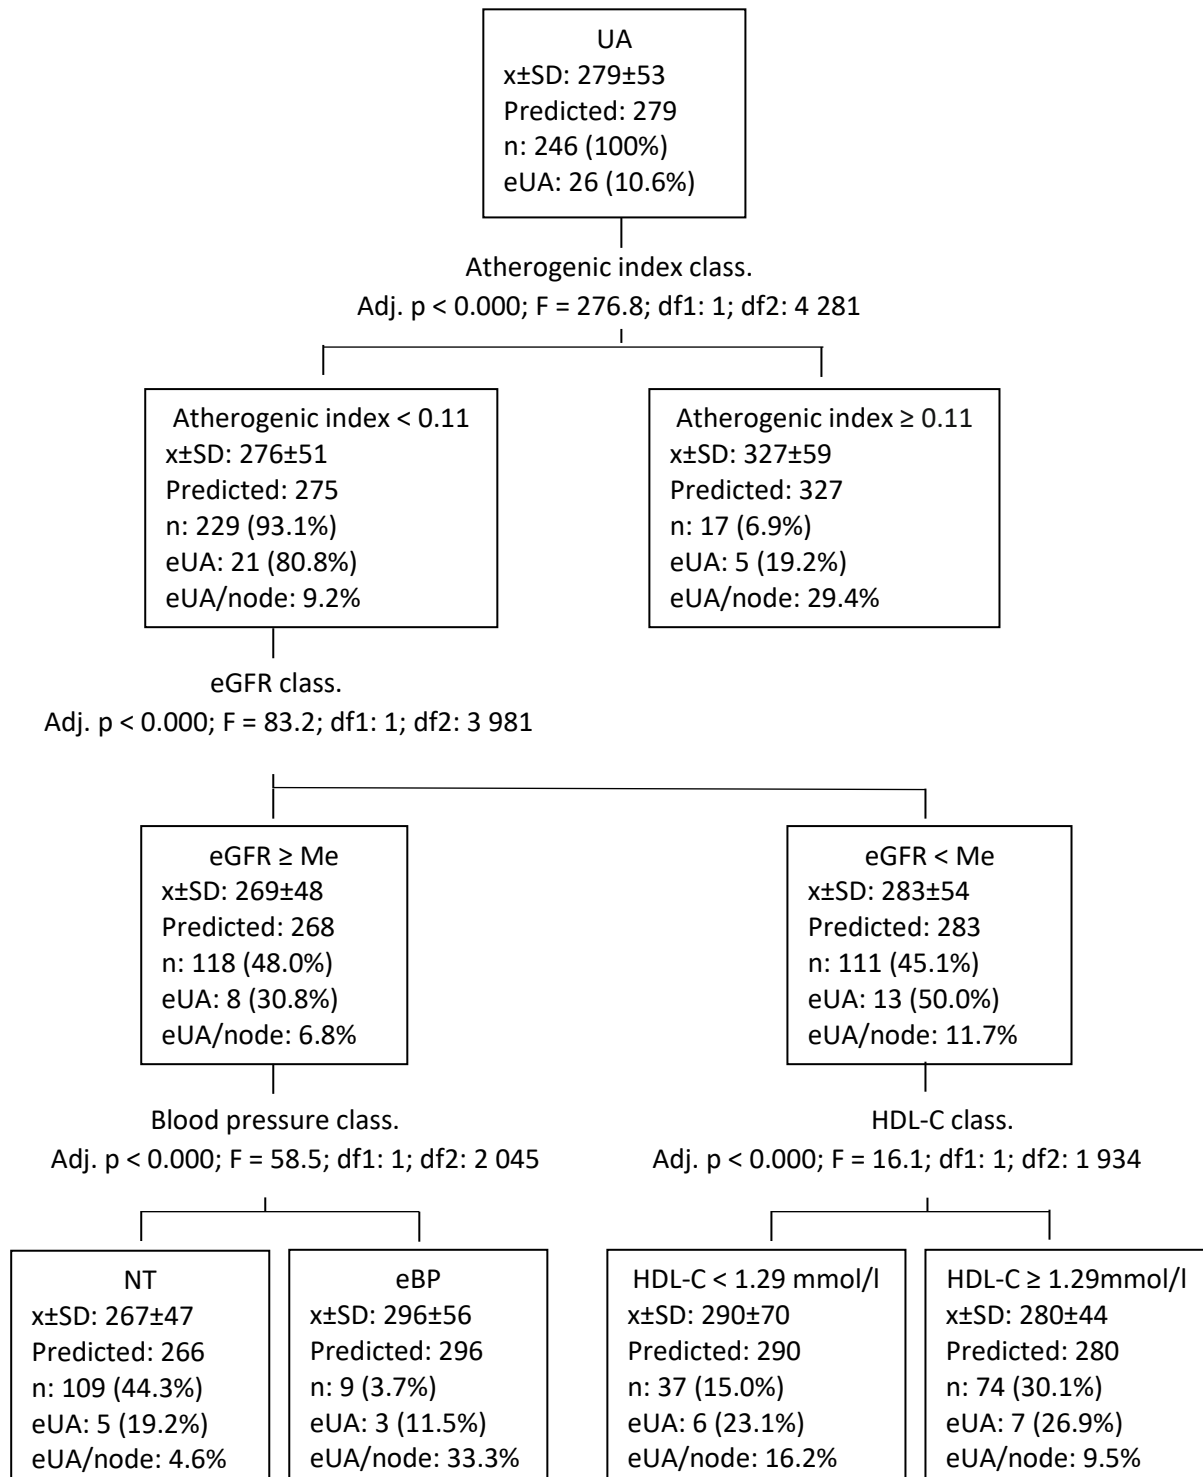

SUA: serum uric acid concentration;  $x \pm SD$ : mean SUA  $\pm$  standard deviation in node; n: number of subjects in node (percentage of all subjects); predicted: SUA concentration predicted by the model; eUA: number of subjects with elevated SUA, e.g.  $\geq 340 \mu\text{mol/l}$  (percentage of all subjects with eUA); eUA/node: prevalence of subjects with SUA in a particular node; class.: classification; Adj.: adjusted; NT: normotension (systolic BP < 130 mmHg and diastolic BP < 85 mmHg); eBP: elevated BP (systolic BP  $\geq 130$  mmHg and/or diastolic BP  $\geq 85$  mmHg); eGFR: estimated glomerular filtration rate; eGFR Me: median = 1.81 mL/s/1.73m<sup>2</sup>

**Supplementary Figure S4: Decision tree: overweight/obese males**

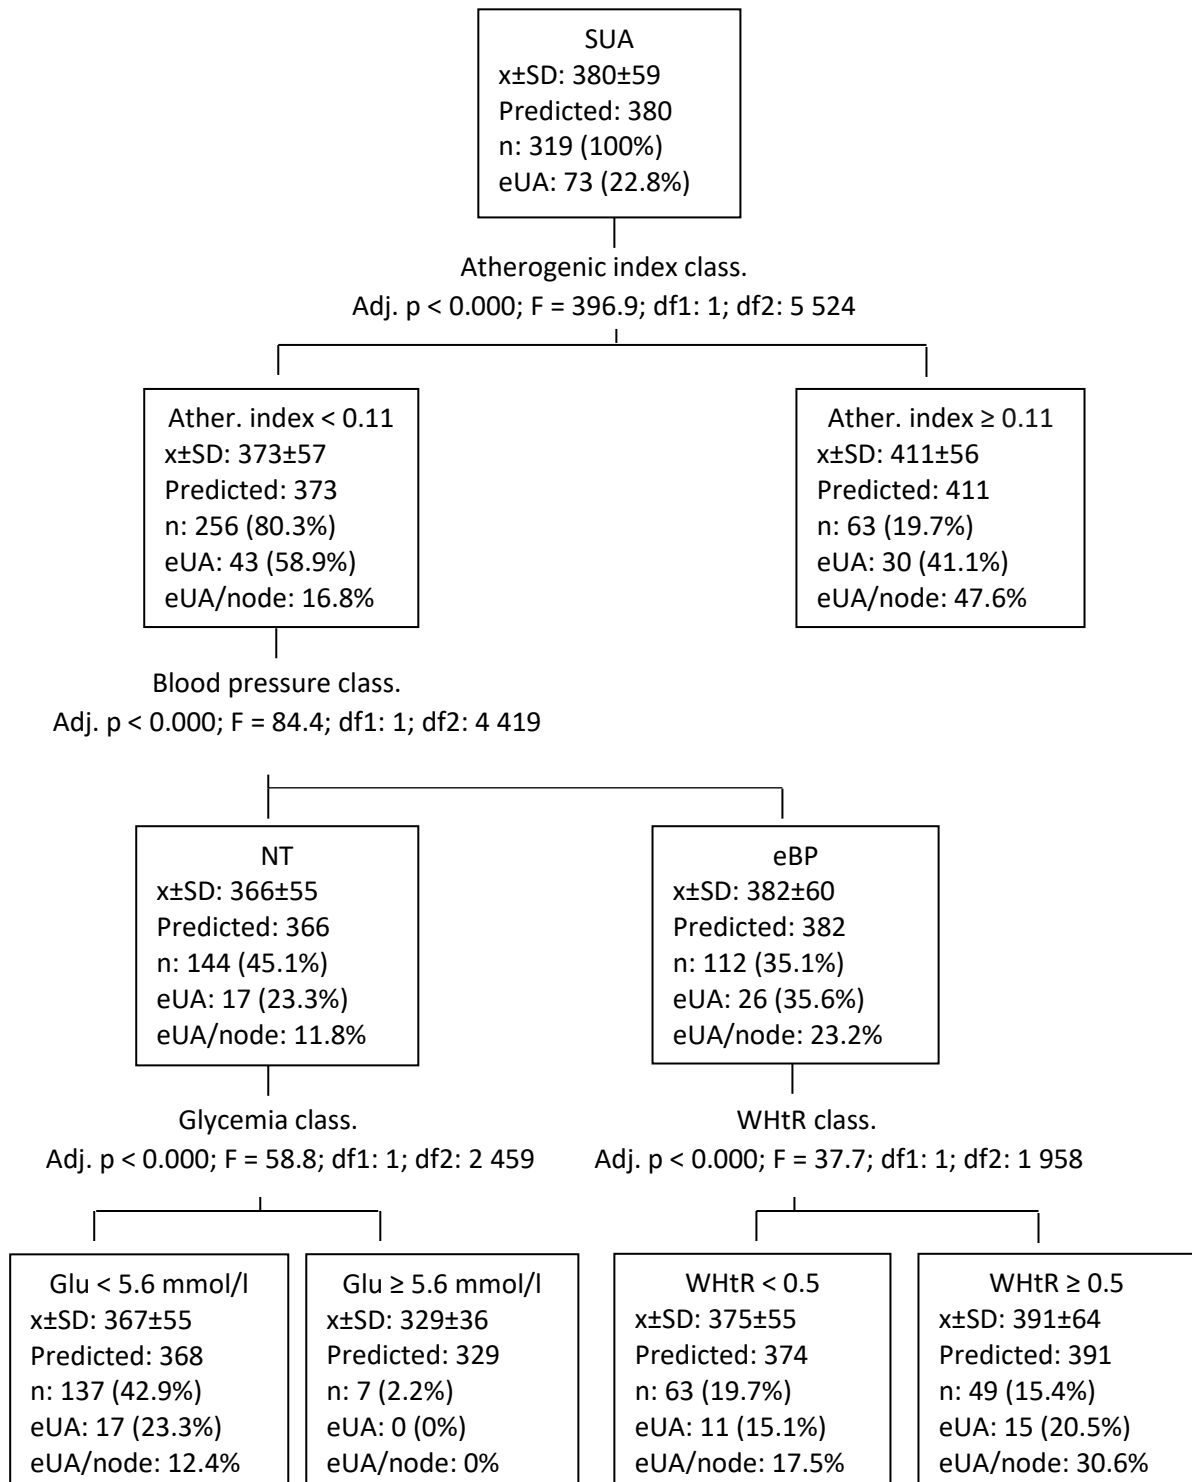

SUA: serum uric acid concentration; x±SD: mean SUA ± standard deviation in node; n: number of subjects in node (percentage of all subjects); predicted: SUA concentration predicted by the model; eUA: number of subjects with elevated SUA, e.g. ≥ 420 μmol/l (percentage of all subjects with eUA); eUA/node: prevalence of subjects with SUA in a particular node; Ather.: atherogenic index of plasma; class.: classification; Adj.: adjusted; NT: normotension (systolic BP < 130 mmHg and diastolic BP < 85 mmHg); eBP: elevated blood pressure (systolic BP ≥ 130 mmHg and/or diastolic BP ≥ 85 mmHg); Glu: fasting plasma glucose; WHtR: waist-to-height ratio
